# Supplementary material for: Evaluating the Inclusion of Cold-Pressed Rapeseed Cake in the Concentrate for Dairy Cows upon Ruminal Biohydrogenation Process, Ruminal Microbial Community and Milk Production and Acceptability
Source: MDPI journal article supplement (doi:10.3390/ani11092553), 2021-08-30
Supplement: s1 [file s1]

**Supplementary Table S4.** OTUs at genus level significantly different ( $q < 0.05$ ) between rumen samples of cows fed control and concentrate with cold-pressed rapeseed cake

| OTU ID     | Taxonomy               | log2FoldChange* | SE    | Adjusted P-value |
|------------|------------------------|-----------------|-------|------------------|
| denovo7988 | <i>Entodinium</i>      | 2.74            | 0.579 | <0.001           |
| denovo3176 | <i>Entodinium</i>      | 2.10            | 0.563 | 0.010            |
| denovo132  | <i>Entodinium</i>      | 2.09            | 0.552 | 0.009            |
| denovo4456 | <i>Entodinium</i>      | 1.97            | 0.580 | 0.021            |
| denovo5608 | UG_Trichostomatia      | 1.87            | 0.580 | 0.031            |
| denovo312  | <i>Entodinium</i>      | 1.66            | 0.558 | 0.046            |
| denovo8298 | <i>Ophryoscolex</i>    | 1.60            | 0.528 | 0.046            |
| denovo8554 | UG_Trichostomatia      | 1.58            | 0.524 | 0.045            |
| denovo263  | <i>Entodinium</i>      | 1.46            | 0.500 | 0.048            |
| denovo1637 | UG_Neocallimastigaceae | -1.50           | 0.518 | 0.050            |
| denovo8811 | <i>Ophryoscolex</i>    | -1.76           | 0.579 | 0.045            |
| denovo5447 | UG_Haptoria            | -2.13           | 0.544 | 0.007            |

UG: undefined genus; SE: standar error; \*significant mean positive log2 fold changes correspond to increased relative abundance in cold-pressed rapeseed cake group and significant mean negative log2 fold changes correspond to decreased relative abundance in cold-pressed rapeseed cake group.
