# Supplementary material for: Evaluating the Inclusion of Cold-Pressed Rapeseed Cake in the Concentrate for Dairy Cows upon Ruminal Biohydrogenation Process, Ruminal Microbial Community and Milk Production and Acceptability
Source: MDPI journal article supplement (doi:10.3390/ani11092553), 2021-08-30
Supplement: s1 [file s1]

**Supplementary Table S3.** Mean relative abundances of bacterial genera in ruminal samples of cows when fed a concentrate formulated with cold-pressed rapeseed cake or a control concentrate

| Genus                                  | Treatment |        | SEM    | P-value |
|----------------------------------------|-----------|--------|--------|---------|
|                                        | CTR       | CPRC   |        |         |
| <i>Prevotella</i> <sup>1</sup>         | 37.1      | 47.6   | 4.46   | 0.1194  |
| <i>Ruminococcus</i> <sup>4</sup>       | 1.89      | 1.45   | 0.142  | 0.0468  |
| <i>Clostridium</i> <sup>1</sup>        | 0.31      | 0.21   | 0.040  | 0.0989  |
| <i>Anaerovibrio</i> <sup>1</sup>       | 0.07      | 0.09   | 0.012  | 0.3404  |
| <i>Succiniclasicum</i> <sup>2</sup>    | 0.59      | 0.48   | 0.073  | 0.3102  |
| <i>Pyramidobacter</i> <sup>2</sup>     | -0.97     | -1.16  | 0.067  | 0.0717  |
| <i>Treponema</i> <sup>3</sup>          | 0.51      | 0.58   | 0.103  | 0.6045  |
| <i>Desulfovibrio</i> <sup>1</sup>      | 0.10      | 0.08   | 0.012  | 0.3026  |
| <i>Acetobacter</i> <sup>2</sup>        | -0.95     | -1.05  | 0.096  | 0.4855  |
| <i>p-75-a5</i> <sup>2</sup>            | -1.21     | -1.43  | 0.054  | 0.0132  |
| <i>Bulleidia</i> <sup>2</sup>          | -1.28     | -1.41  | 0.109  | 0.4216  |
| <i>Mogibacterium</i> <sup>2</sup>      | -0.82     | -0.91  | 0.096  | 0.5429  |
| <i>Shuttleworthia</i> <sup>2</sup>     | -0.99     | -1.28  | 0.095  | 0.0506  |
| <i>Pseudobutyrvibrio</i> <sup>2</sup>  | -0.75     | -0.91  | 0.195  | 0.5877  |
| <i>Lachnospira</i> <sup>2</sup>        | -1.45     | -1.47  | 0.195  | 0.9362  |
| <i>Coproccoccus</i> <sup>2</sup>       | -0.42     | -0.52  | 0.098  | 0.4953  |
| <i>Butyrvibrio</i> <sup>1</sup>        | 5.9       | 4.8    | 0.98   | 0.4197  |
| <i>Blautia</i> <sup>1</sup>            | 0.10      | 0.06   | 0.015  | 0.0459  |
| <i>SHD231</i> <sup>2</sup>             | -1.04     | -1.09  | 0.104  | 0.7324  |
| <i>YRC22</i> <sup>1</sup>              | 0.68      | 0.96   | 0.158  | 0.2319  |
| <i>CF231</i> <sup>1</sup>              | 0.20      | 0.22   | 0.042  | 0.8229  |
| <i>Bifidobacterium</i> <sup>2</sup>    | -1.53     | -2.06  | 0.373  | 0.3310  |
| <i>Vadin CA11</i> <sup>2</sup>         | -1.09     | -0.81  | 0.161  | 0.2315  |
| <i>Methanobrevibacter</i> <sup>2</sup> | 0.02      | 0.09   | 0.083  | 0.5507  |
| <i>Methanosphaera</i> <sup>2</sup>     | -1.21     | -1.07  | 0.102  | 0.3411  |
| UG_Coriobacteriaceae <sup>2</sup>      | -0.65     | -0.76  | 0.106  | 0.4999  |
| UG_Bacteroidales <sup>1</sup>          | 4.4       | 4.0    | 0.54   | 0.5688  |
| UG_BS11 <sup>1</sup>                   | 1.53      | 1.49   | 0.247  | 0.9092  |
| UG_RF16 <sup>1</sup>                   | 0.04      | 0.05   | 0.012  | 0.7448  |
| UG_S247 <sup>1</sup>                   | 1.45      | 1.33   | 0.293  | 0.7592  |
| UG_YS2 <sup>1</sup>                    | 0.11      | 0.12   | 0.031  | 0.9226  |
| UG_Paraprevotellaceae <sup>1</sup>     | 0.13      | 0.12   | 0.024  | 0.6910  |
| UG_Clostridiales <sup>2</sup>          | 0.94      | 0.71   | 0.056  | 0.0160  |
| UG_Christensenellaceae <sup>2</sup>    | -0.45     | -0.64  | 0.057  | 0.0331  |
| UG_Clostridiaceae <sup>2</sup>         | -1.28     | -1.29  | 0.091  | 0.9358  |
| UG_Lachnospiraceae <sup>2</sup>        | -0.91     | -1.16  | 0.059  | 0.0110  |
| UG_Ruminococcaceae <sup>4</sup>        | 0.14      | 0.19   | 0.015  | 0.0344  |
| UG_Veillonaceae <sup>2</sup>           | 0.035     | -0.003 | 0.0936 | 0.7783  |
| UG_Mogibacteriaceae <sup>1</sup>       | 0.42      | 0.34   | 0.042  | 0.2259  |
| UG_Pirellulaceae <sup>1</sup>          | 1.26      | 0.84   | 0.144  | 0.0553  |
| UG_Rickettsiales <sup>2</sup>          | -1.35     | -1.57  | 0.104  | 0.1549  |
| UG_Succinivibrionaceae <sup>2</sup>    | -1.02     | -0.76  | 0.127  | 0.1651  |
| UG_RF16 <sup>1</sup>                   | 4.60      | 3.46   | 0.683  | 0.2553  |
| UG_RF39 <sup>2</sup>                   | -0.47     | -0.67  | 0.061  | 0.0243  |
| UG_RFP12 <sup>2</sup>                  | -0.72     | -0.86  | 0.077  | 0.2434  |
| UG_WCHB125 <sup>2</sup>                | -0.90     | -1.08  | 0.084  | 0.1565  |

CTR: Control; CPCR: cold-pressed rapeseed cake; <sup>1</sup>Untransformed data; <sup>2</sup>Log transformation; <sup>3</sup> square root transformation; <sup>4</sup>reciprocal transformation; SEM: standard error of the mean
