# Supplementary material for: Evaluating the Inclusion of Cold-Pressed Rapeseed Cake in the Concentrate for Dairy Cows upon Ruminal Biohydrogenation Process, Ruminal Microbial Community and Milk Production and Acceptability
Source: MDPI journal article supplement (doi:10.3390/ani11092553), 2021-08-30
Supplement: s1 [file s1]

**Supplementary Table S1.** Mean relative abundances of bacterial and Eukaryote phyla in ruminal samples of cows when fed a concentrate formulated with cold-pressed rapeseed cake or a control concentrate

| Phylum                             | Treatment |        | SEM    | P-value |
|------------------------------------|-----------|--------|--------|---------|
|                                    | CTR       | CPRC   |        |         |
| 16S rRNA                           |           |        |        |         |
| Bacteroidetes <sup>1</sup>         | 45.7      | 55.8   | 5.02   | 0.1762  |
| Firmicutes <sup>1</sup>            | 37.6      | 28.5   | 4.09   | 0.1352  |
| Proteobacteria <sup>2</sup>        | -0.124    | -0.059 | 0.0519 | 0.3976  |
| Tenericutes <sup>2</sup>           | -0.434    | -0.611 | 0.0547 | 0.0382  |
| Euryarchaeota <sup>2</sup>         | 0.105     | 0.225  | 0.0772 | 0.2898  |
| Actinobacteria <sup>2</sup>        | -0.532    | -0.583 | 0.0947 | 0.7076  |
| Chloroflexi <sup>2</sup>           | -0.988    | -1.031 | 0.0945 | 0.7540  |
| Cyanobacteria <sup>2</sup>         | -0.973    | -0.897 | 0.0872 | 0.5465  |
| Planctomycetes <sup>1</sup>        | 1.31      | 0.89   | 0.144  | 0.0560  |
| Spirochaetes <sup>3</sup>          | 0.534     | 0.609  | 0.1006 | 0.6090  |
| Sinergistetes <sup>1</sup>         | 0.152     | 0.111  | 0.0174 | 0.1100  |
| Verrucomicrobia <sup>2</sup>       | -0.442    | -0.608 | 0.0719 | 0.1238  |
| TM7 <sup>1</sup>                   | 4.63      | 3.48   | 0.685  | 0.2552  |
| WPS2 <sup>2</sup>                  | -0.587    | -0.934 | 0.1487 | 0.1214  |
| 18S rRNA                           |           |        |        |         |
| Ascomycota <sup>2</sup>            | 1.42      | 1.47   | 0.088  | 0.7362  |
| Basidiomycota <sup>1</sup>         | 1.40      | 0.59   | 0.479  | 0.2479  |
| Mucoromycota <sup>1</sup>          | 2.63      | 3.08   | 0.703  | 0.6625  |
| Neocallimastigomycota <sup>1</sup> | 11.5      | 3.8    | 2.00   | 0.0163  |
| Ciliophora <sup>1</sup>            | 33.7      | 41.8   | 7.14   | 0.4374  |
| Cercozoa <sup>1</sup>              | 0.25      | 1.02   | 0.613  | 0.3905  |
| Ochrophyta <sup>1</sup>            | 0.029     | 0.040  | 0.0339 | 0.8302  |

CTR: Control; CPRC: cold-pressed rapeseed cake; <sup>1</sup>Untransformed data; <sup>2</sup>Log transformation; <sup>3</sup> square root transformation; SEM: standard error of the mean
