# Supplementary material for: Evaluating the Inclusion of Cold-Pressed Rapeseed Cake in the Concentrate for Dairy Cows upon Ruminal Biohydrogenation Process, Ruminal Microbial Community and Milk Production and Acceptability
Source: MDPI journal article supplement (doi:10.3390/ani11092553), 2021-08-30
Supplement: s1 [file s1]

**Supplementary Table S2.** Mean relative abundances of bacterial families in ruminal samples of cows when fed a concentrate formulated with cold-pressed rapeseed cake or a control concentrate

| Family                                | Treatment |        | SEM    | P-value |
|---------------------------------------|-----------|--------|--------|---------|
|                                       | CTR       | CPRC   |        |         |
| Ruminococcaceae <sup>2</sup>          | 0.90      | 0.79   | 0.038  | 0.0839  |
| Prevotellaceae <sup>1</sup>           | 37.1      | 47.6   | 4.46   | 0.1194  |
| Paraprevotellaceae <sup>1</sup>       | 1.01      | 1.30   | 0.195  | 0.3268  |
| Clostridiaceae <sup>1</sup>           | 0.37      | 0.27   | 0.043  | 0.1299  |
| Lachnospiraceae <sup>2</sup>          | 1.09      | 0.93   | 0.058  | 0.0808  |
| Veillonaceae <sup>1</sup>             | 6.07      | 4.7    | 0.84   | 0.2677  |
| RF16 <sup>1</sup>                     | 4.6       | 3.5    | 0.68   | 0.2553  |
| Christensenellaceae <sup>2</sup>      | -0.45     | -0.64  | 0.057  | 0.0331  |
| Mogibacteriaceae <sup>2</sup>         | -0.25     | -0.33  | 0.058  | 0.3879  |
| Spirochaetaceae <sup>3</sup>          | 0.51      | 0.59   | 0.103  | 0.5971  |
| Desulfovibrionaceae <sup>1</sup>      | 0.14      | 0.11   | 0.013  | 0.1240  |
| Succinivibrionaceae <sup>2</sup>      | -0.94     | -0.72  | 0.122  | 0.2382  |
| Dethiosulfovibrionaceae <sup>1</sup>  | 0.13      | 0.10   | 0.016  | 0.2183  |
| Erysipelotrichaceae <sup>2</sup>      | -0.82     | -0.85  | 0.075  | 0.7939  |
| Pirellulaceae <sup>1</sup>            | 1.27      | 0.84   | 1.144  | 0.0555  |
| Acetobacteriaceae <sup>2</sup>        | -0.94     | -1.04  | 0.097  | 0.4664  |
| Anaerolinaceae <sup>2</sup>           | -1.04     | -1.09  | 0.104  | 0.7324  |
| RFP12 <sup>2</sup>                    | -0.72     | -0.86  | 0.077  | 0.2434  |
| S24-7 <sup>1</sup>                    | 1.45      | 1.33   | 0.293  | 0.7592  |
| Coriobacteriaceae <sup>2</sup>        | -0.61     | -0.70  | 0.101  | 0.5384  |
| Methanobacteriaceae <sup>2</sup>      | 0.05      | 0.12   | 0.083  | 0.1570  |
| Methanomassiliicoccaceae <sup>2</sup> | -1.01     | -0.84  | 0.139  | 0.3850  |
| BS11 <sup>1</sup>                     | 1.53      | 1.50   | 0.247  | 0.9092  |
| WCHB125 <sup>2</sup>                  | -0.90     | -1.08  | 0.084  | 0.1565  |
| WPS2 <sup>2</sup>                     | -0.587    | -0.934 | 0.1487 | 0.1214  |
| UF_bacteroidales <sup>1</sup>         | 4.4       | 4.0    | 0.54   | 0.5688  |
| UF_YS2 <sup>1</sup>                   | 0.11      | 0.12   | 0.031  | 0.9226  |
| UF_Clostridiales <sup>2</sup>         | 0.93      | 0.71   | 0.057  | 0.0160  |
| UF_RF39 <sup>2</sup>                  | -0.47     | -0.69  | 0.061  | 0.0243  |

CTR: Control; CPRC: cold-pressed rapeseed cake; <sup>1</sup>Untransformed data; <sup>2</sup>Log transformation; <sup>3</sup> square root transformation; SEM: standard error of the mean
